# Supplementary material
Source: PubMed Central journal article supplement (PMC3345036)
Supplement: 12154_2011_70_MOESM1_ESM.pdf [file 12154_2011_70_MOESM1_ESM.pdf]

**Table S.1 List of significant genes responded to 56MESS (0.45 mM) treatment for 1 h**

| Genes                      | Systemic name | Fold Change | Genes                        | Systemic name | Fold Change |
|----------------------------|---------------|-------------|------------------------------|---------------|-------------|
| <i>up</i> -regulated genes |               |             | <i>up</i> -regulated genes   |               |             |
| FIT2                       | YOR382W       | 12.442      | EEB1                         | YPL095C       | 1.516       |
| ARN2                       | YHL047C       | 11.321      | <i>down</i> -regulated genes |               |             |
| FIT3                       | YOR383C       | 6.116       | GRX4                         | YER174C       | -1.503      |
| FRE1                       | YLR214W       | 5.644       | HEM13                        | YDR044W       | -1.503      |
| YLR307C-A                  | YLR307C-A     | 4.845       | SUR1                         | YPL057C       | -1.512      |
| TIS11                      | YLR136C       | 4.685       | TPS2                         | YDR074W       | -1.513      |
| ARN1                       | YHL040C       | 4.651       | YIR014W                      | YIR014W       | -1.515      |
| FRE2                       | YKL220C       | 4.408       | YEL007W                      | YEL007W       | -1.518      |
| ENB1                       | YOL158C       | 4.250       | ILV6                         | YCL009C       | -1.538      |
| FRE5                       | YOR384W       | 3.742       | MNN4                         | YKL201C       | -1.541      |
| YLR031W                    | YLR031W       | 3.615       | JSN1                         | YJR091C       | -1.548      |
| SIT1                       | YEL065W       | 3.182       | TPO4                         | YOR273C       | -1.551      |
| HMX1                       | YLR205C       | 2.970       | YBL086C                      | YBL086C       | -1.552      |
| RSB1                       | YOR049C       | 2.684       | HOM3                         | YER052C       | -1.573      |
| ARO9                       | YHR137W       | 2.371       | YOR356W                      | YOR356W       | -1.575      |
| SPR28                      | YDR218C       | 2.345       | CSR1                         | YLR380W       | -1.591      |
| YHR140W                    | YHR140W       | 2.095       | CAF120                       | YNL278W       | -1.591      |
| CCC2                       | YDR270W       | 2.085       | DDP1                         | YOR163W       | -1.596      |
| GTO3                       | YMR251W       | 2.051       | NDI1                         | YML120C       | -1.605      |
| YDR374C                    | YDR374C       | 1.977       | ECM40                        | YMR062C       | -1.656      |
| FRM2                       | YCL026C-A     | 1.976       | ICY2                         | YPL250C       | -1.696      |
| ADH2                       | YMR303C       | 1.972       | GLT1                         | YDL171C       | -1.708      |
| YLR012C                    | YLR012C       | 1.950       | ACH1                         | YBL015W       | -1.727      |
| YOR387C                    | YOR387C       | 1.930       | CCP1                         | YKR066C       | -1.727      |
| ANS1                       | YHR126C       | 1.928       | FMP43                        | YGR243W       | -1.737      |
| FRE3                       | YOR381W       | 1.925       | YPR036W-A                    | YPR036W-A     | -1.784      |
| PRM5                       | YIL117C       | 1.908       | XBP1                         | YIL101C       | -1.804      |
| FYV12                      | YOR183W       | 1.895       | ECM17                        | YJR137C       | -1.838      |
| ECM11                      | YDR446W       | 1.886       | SAM3                         | YPL274W       | -1.874      |
| LOH1                       | YJL038C       | 1.882       | SDH1                         | YKL148C       | -1.904      |
| FTR1                       | YER145C       | 1.841       | STR3                         | YGL184C       | -1.905      |
| SLZ1                       | YNL196C       | 1.834       | MET17                        | YLR303W       | -1.922      |
| PUG1                       | YER185W       | 1.831       | PHM7                         | YOL084W       | -1.933      |
| CTR1                       | YPR124W       | 1.813       | YNR014W                      | YNR014W       | -1.946      |
| SPO19                      | YPL130W       | 1.738       | ARG4                         | YHR018C       | -1.969      |
| DTR1                       | YBR180W       | 1.728       | SUL2                         | YLR092W       | -1.981      |
| VMR1                       | YHL035C       | 1.715       | MET13                        | YGL125W       | -1.997      |
| FRE6                       | YLL051C       | 1.692       | CPA2                         | YJR109C       | -2.016      |
| YDR089W                    | YDR089W       | 1.692       | MET28                        | YIR017C       | -2.021      |
| SRD1                       | YCR018C       | 1.685       | CYC7                         | YEL039C       | -2.069      |
| PDH1                       | YPR002W       | 1.681       | SDH2                         | YLL041C       | -2.149      |
| YNR004W                    | YNR004W       | 1.668       | RTC2                         | YBR147W       | -2.184      |
| CIT3                       | YPR001W       | 1.658       | CAR2                         | YLR438W       | -2.306      |
| GAL10                      | YBR019C       | 1.653       | PCL5                         | YHR071W       | -2.326      |
| MRPS28                     | YDR337W       | 1.598       | ARG1                         | YOL058W       | -2.345      |
| FIG1                       | YBR040W       | 1.565       | YGL117W                      | YGL117W       | -2.567      |
| CRG1                       | YHR209W       | 1.557       | PTR2                         | YKR093W       | -2.699      |
