# Supplementary material
Source: PubMed Central journal article supplement (PMC3345036)
Supplement: 12154_2011_70_MOESM2_ESM.pdf [file 12154_2011_70_MOESM2_ESM.pdf]

---

| <b>Label in Fig 2</b> | <b>GO biological pathways</b> |
|-----------------------|-------------------------------|
|-----------------------|-------------------------------|

---

For 56MESS **up**-regulated genes

---

|          |                                                        |
|----------|--------------------------------------------------------|
| <b>a</b> | transport                                              |
| <b>b</b> | cellular homeostasis                                   |
| <b>c</b> | cellular component morphogenesis                       |
| <b>d</b> | cofactor metabolic process                             |
| <b>e</b> | cellular amino acid metabolic process                  |
| <b>f</b> | cellular membrane organization                         |
| <b>g</b> | generation of precursor metabolites and energy         |
| <b>h</b> | cellular lipid metabolic process                       |
| <b>i</b> | fungus-type cell wall organization                     |
| <b>j</b> | meiosis                                                |
| <b>k</b> | sporulation resulting in formation of a cellular spore |
| <b>l</b> | cellular respiration                                   |
| <b>m</b> | conjugation                                            |
| <b>n</b> | cellular aromatic compound metabolic process           |

For 56MESS **down**-regulated genes

---

|             |                                                |
|-------------|------------------------------------------------|
| <b>I</b>    | cellular amino acid metabolic process          |
| <b>II</b>   | response to stress                             |
| <b>III</b>  | cellular respiration                           |
| <b>IV</b>   | generation of precursor metabolites and energy |
| <b>V</b>    | cofactor metabolic process                     |
| <b>VI</b>   | response to chemical stimulus                  |
| <b>VII</b>  | cellular carbohydrate metabolic process        |
| <b>VIII</b> | fungus-type cell wall organization             |
| <b>IX</b>   | heterocycle metabolic process                  |
| <b>X</b>    | cellular lipid metabolic process               |

---
